# Supplementary material for: Robust precoder-decoder design for physical layer network coding-based MIMO two-way relaying system
Source: Springer Nature journal article supplement (doi:10.1186/1687-1499-2013-137), 2013-05-26

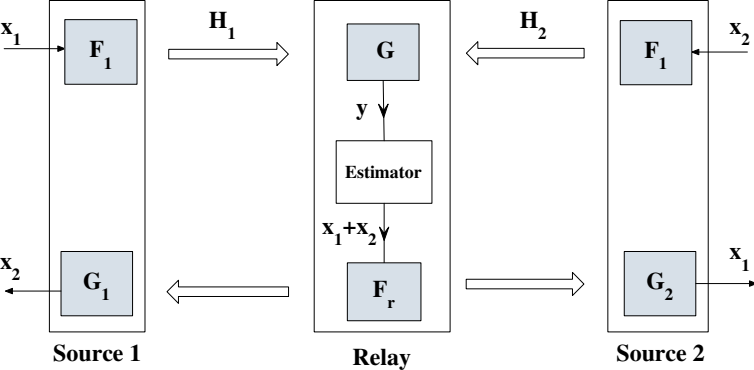

Supplement: 13638_2013_700_MOESM1_ESM.pdf [file 13638_2013_700_MOESM1_ESM.pdf]
